# Supplementary material for: Tropospheric ozone responses to the El Niño-Southern Oscillation (ENSO): quantification of individual processes and future projections from multiple chemical models
Source: Copernicus journal article supplement (doi:10.5194/egusphere-2025-782), 2025-03-13
Supplement: Supplementary file [file egusphere-2025-782-AC2-supplement.pdf]

## **Reviewer #1**

**Comment [1-1]:** This study investigates the response of tropospheric ozone to ENSO using a combination of satellite data, the GEOS-Chem chemical transport model, and CMIP6 chemistry-climate models (CCMs). The authors evaluate GEOS-Chem against OMI/MLS satellite observations, conduct sensitivity experiments to disentangle the roles of transport, chemistry, and biomass burning, and assess how well CMIP6 models capture the observed ozone-ENSO relationship. Finally, the study examines projections under the SSP3-7.0 scenario using selected CMIP6 models.

The key conclusions are:

- GEOS-Chem reproduces observed ozone-ENSO variability very well.
- ENSO-driven changes in transport (via the Walker Circulation) explain most of the ozone variability, though chemistry and biomass burning also contribute.
- CMIP6 models with interactive chemistry capture the ozone-ENSO response more realistically than those with prescribed chemistry.

This is an interesting and timely study that falls well within the scope of ACP. I recommend publication after the following concerns are addressed.

**Response [1-1]: We thank the reviewer for the positive and valuable comments. All of them have been implemented in the revised manuscript. Please see our itemized responses below.**

**Comment [1-2]:** The manuscript would benefit from a deeper discussion of the limitations of the sensitivity experiment design. The assumption of linear additivity may not fully capture the interactions between transport, chemistry, and emissions. For example, transport changes also affect precursor distributions, which in turn influence ozone chemistry. Can the authors quantify how much of the total ozone response is not explained by the sum of the isolated processes (e.g., residuals)? This would help assess

the robustness of the attribution.

**Response [1-2]:** Thank you for your suggestion. We have conducted additional analysis to evaluate and discuss the degree of nonlinearity. We derived the interactive effect as the difference between the combined effect (estimated by the TOTAL simulation) and the additive effects of transport, chemistry, and biomass burning emissions, as shown in the revised Table 3. We have added the following paragraph to discuss the interactive effect and the limitation of sensitivity experiment design in Section 3.2: “We can quantify the interactive effect between the chemistry, transport, and biomass burning emissions as the TCO difference between the combined effect and the additive values from the individual effects. Results are shown in Table 3. We find that for the WP region during the El Niño period and the EP region during the La Niña period, the interactive effect tends to amplify the ozone increase. Conversely, for the WP region during La Niña period and the EP region during the El Niño period, the interactive effect tends to weaken the ozone decrease. Part of this interactive effect can be clearly illustrated, as can be seen from the comparison of our result to Sekiya and Sudo (2012) as discussed above. For example, during the El Niño period, higher surface temperature over Indonesia due to the anomalous subsidence may further amplify ozone production from biomass burning emissions, thus the interactive effect leads to a further ozone increase. However, quantifying each interactive mechanism requires much more additional model experiments with more complicated design. Nevertheless, the above analysis again highlights the complex interaction between natural sources, chemistry, and transport in the ozone response to climate variability (Lu et al., 2019a).”

**Table 3. TCO changes due to the combined and individual effects of transport, chemistry, biomass burning emissions and interactive effect.**

| TCO difference | El Niño | La Niña |
|----------------|---------|---------|
|                |         |         |

| [DU] <sup>a</sup>                            | WP                | EP                | WP                | EP                |
|----------------------------------------------|-------------------|-------------------|-------------------|-------------------|
| <b>BASE simulation</b>                       | <b>1.6</b>        | <b>-2.4</b>       | <b>-0.7</b>       | <b>0.9</b>        |
| <b>Combined effect</b>                       | <b>1.5</b>        | <b>-2.4</b>       | <b>-0.5</b>       | <b>1.1</b>        |
| <b>Transport</b>                             | <b>0.8</b>        | <b>-2.2</b>       | <b>-0.6</b>       | <b>0.8</b>        |
| <b>Chemistry</b>                             | <b>-0.2</b>       | <b>-0.7</b>       | <b>-0.6</b>       | <b>-0.2</b>       |
| <b>Biomass burning<br/>emissions</b>         | <b>0.4</b>        | <b>0.1</b>        | <b>0.1</b>        | <b>0.1</b>        |
| <b><u>Interactive effect<sup>b</sup></u></b> | <b><u>0.5</u></b> | <b><u>0.4</u></b> | <b><u>0.6</u></b> | <b><u>0.4</u></b> |

<sup>a</sup> Values are estimated by contrasting the model results using El Niño/La Niña conditions with the Normal periods over the WP and EP region from the sensitivity simulations.

<sup>b</sup> The interactive effect is derived as the difference between the combined effect and the additive effect of transport, chemistry, and biomass burning emissions.

**Comment [1-3]:** The discussion of chemical contributions to the ozone-ENSO response is somewhat limited. It would be helpful if the authors could provide quantitative changes in lightning NO<sub>x</sub> and BVOC emissions under ENSO conditions from their simulations. Can these changes be linked to the observed or modelled ozone responses, particularly in the eastern Pacific?

**Response [1-3]:** Thank you for pointing it out. We have added the following discussion to Section 3.2: “In comparison, ozone changes induced by lightning NO<sub>x</sub> and BVOCs (e.g., isoprene) in response to temperature variations are smaller than those driven by water vapor in the CHEMISTY experiment. Our model simulation yields a small decrease in lightning NO<sub>x</sub> emissions of 6% an increase in biogenic isoprene emissions of 4% during the El Niño conditions in the WP region. In the EP region, both lightning NO<sub>x</sub> and biogenic isoprene emissions

**exhibit negligible changes. Thus, the chemistry effect is dominated by changes in water vapor, especially on the global scale.”**

**Comment [1-4]:** While spatial correlation is an informative metric, the authors do not assess how well the models capture the magnitude of interannual variability in TCO. A model may simulate the correct spatial pattern but still underestimate variability. Consider including an evaluation of the standard deviation or amplitude of the TCO–ENSO relationship (e.g., variance in the regression residuals) for each model.

**Response [1-4]:** We agree. For the exact reason, we have derived the regression slope  $m_{\text{TCO-Niño34}}$  (unit: DU K<sup>-1</sup>) to quantify the magnitude of the TCO change in response to a 1K change in the Niño3.4 index. The comparison between observed and simulated (from GEOS-Chem and CMIP6 models) spatial distributions of  $m_{\text{TCO-Niño34}}$  are shown in Figure S2 and Figure S7.

We have discussed the ability of the models in capturing  $m_{\text{TCO-Niño34}}$  in section 3.1: **“The simulated TCO-ENSO sensitivities ( $m_{\text{TCO-Niño34}}$ ) are 1.2 and -1.5 DU K<sup>-1</sup>, which also agree well with the observed values of 1.3 and -1.3 DU K<sup>-1</sup>.”**

We have also added the following evaluation in section 4.1: **“These five models show  $m_{\text{mean}}$  of  $1.0 \pm 0.4$  DU K<sup>-1</sup> for the WP region and  $-1.4 \pm 0.3$  DU K<sup>-1</sup> for the EP region, compared to the observed values of 1.3 and -1.4 DU K<sup>-1</sup>, respectively.”**

**Comment [1-5]:** The manuscript lacks a clear explanation of how ENSO events are identified in the CMIP6 models under the SSP3-7.0 scenario. Since these models are free-running, ENSO phasing and intensity are not aligned with observations and may differ significantly between models.

**Response [1-5]:** Thank you for pointing it out. The ENSO events in the CMIP6 models are identified based on the simulated sea surface temperature (SST)

averaged over the Niño3.4 region (5°N–5°S, 170°W–120°W) from each model, which is a commonly used method for CMIP models in ENSO research (*e.g.*, Callahan et al., 2021; Cai et al., 2022). The El Niño and La Niña periods in the CMIP6 models are defined following the NOAA standard, with the Niño3.4 index greater than 0.5 and less than -0.5.

We have clarified this point in Section 2.4: “As the CMIP6 simulations analyzed here are not constrained by observed SSTs, the ENSO phases and intensity are not aligned with observations and may differ significantly between models. Following other ENSO-related studies using CMIP6 projections (*e.g.*, Callahan et al., 2021; Cai et al., 2022), we calculate the Niño3.4 index by using the same methodology as Formula 1 but with simulated sea surface temperature (SST) for each CMIP6 model. The Niño3.4 index under future SSP3-7.0 scenario is linearly detrended over 2066-2100. The El Niño and La Niña periods in the CMIP6 models are defined following the NOAA standard, with the Niño3.4 index greater than 0.5 and less than -0.5, respectively.”

#### Reference:

- Cai, W., Ng, B., Wang, G., Santoso, A., Wu, L., and Yang, K.: Increased ENSO sea surface temperature variability under four IPCC emission scenarios, *Nat. Clim. Chang.*, 12, 228–231, <https://doi.org/10.1038/s41558-022-01282-z>, 2022.
- Callahan, C. W., Chen, C., Rugenstein, M., Bloch-Johnson, J., Yang, S., and Moyer, E. J.: Robust decrease in El Niño/Southern Oscillation amplitude under long-term warming, *Nat. Clim. Chang.*, 11, 752–757, <https://doi.org/10.1038/s41558-021-01099-2>, 2021.

**Comment [1-6]:** The introduction would benefit from additional references, especially in lines 32, 33, 44, and 46. In particular, the discussion of BVOC and lightning NO<sub>x</sub> responses to ENSO could be expanded. Suggested references:

<https://agupubs.onlinelibrary.wiley.com/doi/full/10.1002/jgrd.50857>

<https://bg.copernicus.org/articles/20/4391/2023/>

<https://www.frontiersin.org/articles/10.3389/ffgc.2018.00012/full>

**Response [1-6]: We have added the corresponding references and the discussion of BVOC and lightning NO<sub>x</sub> responses to ENSO to Section 1: “ENSO also modulates tropospheric ozone concentrations by altering tropic lightning NO<sub>x</sub> emissions (Murray et al., 2013), biogenic volatile organic compounds (BVOCs) emissions (Pfannerstill et al., 2018; Vella et al., 2023) and stratospheric-tropospheric exchanges (Doherty et al., 2006; Zeng and Pyle, 2005).”**

**Reference:**

- Doherty, R. M., Stevenson, D. S., Johnson, C. E., Collins, W. J., and Sanderson, M. G.: Tropospheric ozone and El Niño–Southern Oscillation: Influence of atmospheric dynamics, biomass burning emissions, and future climate change, *Journal of Geophysical Research: Atmospheres*, 111, <https://doi.org/10.1029/2005JD006849>, 2006.
- Murray, L. T., Logan, J. A., and Jacob, D. J.: Interannual variability in tropical tropospheric ozone and OH: The role of lightning, *Journal of Geophysical Research: Atmospheres*, 118, 11,468–11,480, <https://doi.org/10.1002/jgrd.50857>, 2013.
- Pfannerstill, E. Y., Nölscher, A. C., Yáñez-Serrano, A. M., Bourtsoukidis, E., Keßel, S., Janssen, R. H. H., Tsokankunku, A., Wolff, S., Sörgel, M., Sá, M. O., Araújo, A., Walter, D., Lavrič, J., Dias-Júnior, C. Q., Kesselmeier, J., and Williams, J.: Total OH Reactivity Changes Over the Amazon Rainforest During an El Niño Event, *Front. For. Glob. Change*, 1, <https://doi.org/10.3389/ffgc.2018.00012>, 2018.
- Vella, R., Pozzer, A., Forrest, M., Lelieveld, J., Hickler, T., and Tost, H.: Changes in biogenic volatile organic compound emissions in response to the El Niño–Southern Oscillation, *Biogeosciences*, 20, 4391–4412, <https://doi.org/10.5194/bg-20-4391-2023>, 2023.
- Zeng, G. and Pyle, J. A.: Influence of El Niño Southern Oscillation on

stratosphere/troposphere exchange and the global tropospheric ozone budget, Geophysical Research Letters, 32, <https://doi.org/10.1029/2004GL021353>, 2005.

**Comment [1-7]:** The SST values used in the sensitivity simulations should be described more clearly.

**Response [1-7]:** Thank you for your suggestion. In our sensitivity simulations using offline GEOS-Chem model, the model was driven by MERRA-2 reanalysis meteorological fields rather than direct SST inputs, same as in the BASE simulation. MERRA-2 reanalysis meteorology provides fully consistent, observationally constrained atmospheric states (including derived SST influences on atmospheric processes) that better represent real-world conditions.

**Comment [1-8]:** More explanation is needed on how  $r_{\text{TCO-Niño3.4}}$  is calculated. Are the Niño3.4 index values spatially uniform?

**Response [1-8]:** Thank you for your suggestion. The Niño3.4 index is spatially uniform. We have clarified in Section 2.5: “The  $r_{\text{TCO-Niño3.4}}$  and  $m_{\text{TCO-Niño3.4}}$  for each grid are calculated as:

$$r_{X-Y} = \frac{\sum_{i=1}^n (X_i - \bar{X})(Y_i - \bar{Y})}{\sqrt{\sum_{i=1}^n (X_i - \bar{X})^2} \sqrt{\sum_{i=1}^n (Y_i - \bar{Y})^2}} \quad (2)$$

$$m_{X-Y} = \frac{\sum_{i=1}^n (X_i - \bar{X})(Y_i - \bar{Y})}{\sum_{i=1}^n (Y_i - \bar{Y})^2} \quad (3)$$

Where  $X_i$  is the gridded monthly deseasonalised and detrended TCO,  $Y_i$  is the monthly Niño3.4 index. These metrics effectively normalize comparisons across models with differing climate variability backgrounds.”

**Comment [1-9]:** While the manuscript avoids using a p-value threshold, some

discussion of statistical confidence is warranted. How confident are the authors that the reported correlations and sensitivities exceed internal variability?

**Response [1-9]:** Thank you for raising this point. We continue to use the p-value as a valuable metric for quantifying statistical confidence, but avoid using thresholds such as  $p \leq 0.05$  to judge whether the reported values are statistically “significant”. We clarify in Section 2.5: “We report the  $p$ -value of corresponding  $r_{\text{TCO-Niño34}}$  and  $m_{\text{TCO-Niño34}}$  where applicable, but we do not use thresholds such as  $p \leq 0.05$  to judge whether the reported values are statistically significant, as advised by the statistics community (Wasserstein et al., 2019). Still, smaller  $p$ -value indicates higher statistical confidence.”

**Reference:**

Wasserstein, R. L., Schirm, A. L., and Lazar, N. A.: Moving to a World Beyond “ $p < 0.05$ ,” The American Statistician, 73, 1–19, <https://doi.org/10.1080/00031305.2019.1583913>, 2019.

**Comment [1-10]:** The manuscript would benefit from a brief overview of the SST and ocean components in the CMIP6 models.

**Response [1-10]:** We have added the information of the ocean component of CMIP6 in Table S1 and briefly introduced it in Section 2.4: “Table S1 summarizes the ocean components of the CMIP6 models analyzed in this study, including their resolutions. These model configurations represent the current generation of ocean-atmosphere coupling systems used for simulating ENSO dynamics.”

Table S1. Ocean components and sea surface temperature SST calculation information of the CMIP6 models used in this study.



| Name              | Ocean components   | Resolution | Reference                 |
|-------------------|--------------------|------------|---------------------------|
| AWI-ESM-1-1-LR    | FESOM 1.4          | 50km       | Shi et al. (2020)         |
| BCC-ESM1          | MOM4               | 50km       | Wu et al. (2020)          |
| CESM2-WACCM       | POP2               | 100km      | Danabasoglu et al. (2020) |
| EC-Earth3-AerChem | NEM3.6             | 100km      | Döscher et al. (2022)     |
| GFDL-ESM4         | MOM6               | 25km       | Dunne et al. (2020)       |
| IPSL-CM6A-LR-INCA | NEMO-OPA           | 100km      | Boucher et al. (2020)     |
| MPI-ESM-1-2-HAM   | MPIOM1.63          | 50km       | Mauritsen et al. (2019)   |
| MRI-ESM2-0        | COM4.4             | 100 km     | Yukimoto et al. (2019)    |
| NorESM2-MM        | MICOM              | 100 km     | Seland et al. (2020)      |
| UKESM1-0-LL       | NEMO-HadGEM3-GO6.0 | 100 km     | Sellar et al. (2019)      |

**Comment [1-11]:**

The frequent use of opposing effects in parentheses (e.g., “increase (decrease)”) in the abstract and main text is hard to read. Consider rephrasing for clarity.

**Response [1-11]:** We have revised where applicable. However, due to word limit, this usage has been retained in the abstract.

**Comment [1-12]:**

Lines 136–137 suggest that GEOS-Chem runs freely, but the model is in fact driven by nudged reanalysis meteorology. Please clarify this to avoid contradiction.

Line 205 – consider rephrasing to improve clarity.

Line 274 – citation needed.

Line 364 – “nudging” is more accurate than “imposing.”

Line 375 – are these effects statistically significant?

Line 399 – citation needed.

Use the more established term Chemistry-Climate Models (CCMs) instead of “climate-chemistry models.”

Line 374 – contains a typo.

Lines 510–517: The explanation of future projections is unclear. How are you comparing responses under “the same SST anomalies” when SSTs are not synchronised across free-running models? Please clarify or rephrase.

**Response [1-12]: Thank you for pointing it out. We have corrected them accordingly.**
